# Supplementary material for: Direct ROS Scavenging Activity of CueP from Salmonella enterica serovar Typhimurium
Source: PubMed Central journal article supplement — Mol Cells. 2014 Feb 19;37(2):100–8. doi: 10.14348/molcells.2014.2238 (PMC3935622; doi:10.14348/molcells.2014.2238), 2014-02-19

## Supplemental Figures

**Supplemental Figure S1. Tandem mass spectra of cysteine-containing peptides identified from the trypsin/chymotrypsin-digested CueP proteins.** The corresponding peaks of the precursor MS2 ions with the given average mass ( $m/z$ ) and charge state ( $z$ ) in parenthesis are shown by extracted ion chromatograms in the main Fig. 2A with the following assignments: **a**,  $^{93}\text{THPCF}^{97}$ ; **b**,  $^{98}\text{NHSLSGCGGEMPNKPF}^{113}$ ; and **c**,  $^{158}\text{TASHAIATSDDSQTCLTELPLR}^{179}$ . The subscripts following symbols of the peaks represent modifications at the underlined cysteine (C) and histidine (H) residues: IAA or NEM, alkylation of cysteine with iodoacetamide or *N*-ethylmaleimide; H, protonation of histidine at position 94 ( $a_{\text{H}}$ ) or 99 ( $b_{\text{H}}$ ); and -SS-, disulfide bond. Assigned *b*-ions and *y*-ions generated by collision-induced fragmentation of the precursor. Ions are shown in the following tandem mass spectra and tables with the one-letter amino acid codes.

(a) Tandem mass spectra of the modified peptides of <sup>93</sup>THPCF<sup>97</sup> in the panels a and d of extracted ion chromatograms.

a<sub>IAA</sub>: carbamidomethyl cysteine C<sup>CAM</sup> at Cys96 ( $m/z = 331.36$ ,  $z = +2$ )

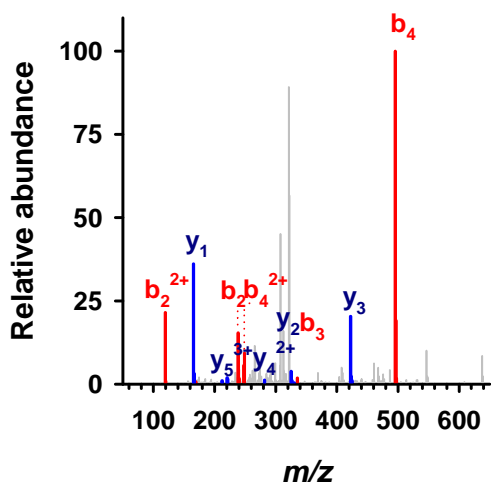

| # | b      | b++    | Seq.             | y      | y++    | y+++   | # |
|---|--------|--------|------------------|--------|--------|--------|---|
| 1 |        |        | T                | 661.72 | 331.36 | 221.24 | 5 |
| 2 | 239.25 | 120.13 | H                | 560.62 | 280.81 |        | 4 |
| 3 | 336.37 | 168.69 | P                | 423.48 | 212.24 |        | 3 |
| 4 | 496.53 | 248.77 | C <sup>CAM</sup> | 326.36 | 163.68 |        | 2 |
| 5 |        |        | F                | 166.2  |        |        | 1 |

SEQUEST result:  
Matches = 31, S<sub>p</sub>Score = 381.3

a<sub>NEM</sub>: N-ethylmaleimide cysteine C<sup>NEM</sup> at Cys96 ( $m/z = 365.42$ ,  $z = +2$ )

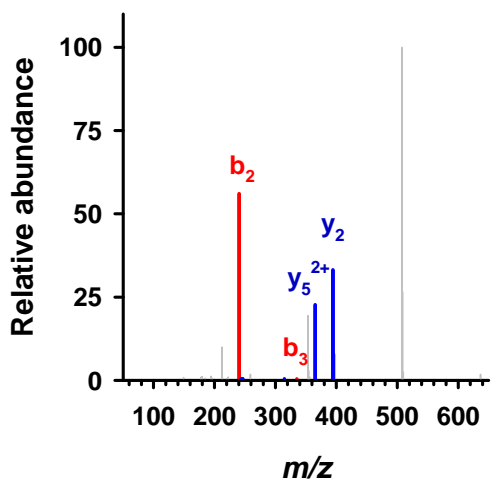

| # | b      | b++    | Seq.             | y      | y++    | y+++   | # |
|---|--------|--------|------------------|--------|--------|--------|---|
| 1 |        |        | T                | 729.83 | 365.42 | 243.95 | 5 |
| 2 | 239.25 | 120.13 | H                | 628.72 | 314.87 | 210.25 | 4 |
| 3 | 336.37 | 168.69 | P                | 491.58 | 246.3  |        | 3 |
| 4 | 564.64 | 282.82 | C <sup>NEM</sup> | 394.47 | 197.74 |        | 2 |
| 5 |        |        | F                | 166.2  |        |        | 1 |

SEQUEST result:  
Matches = 25, S<sub>p</sub>Score = 206.3

$a_{H,IAA}$ : protonated histidine  $H^H$  at His94 and carbamidomethyl cysteine  
 $C^{CAM}$  at Cys96 ( $m/z = 331.87$ ,  $z = +2$ )

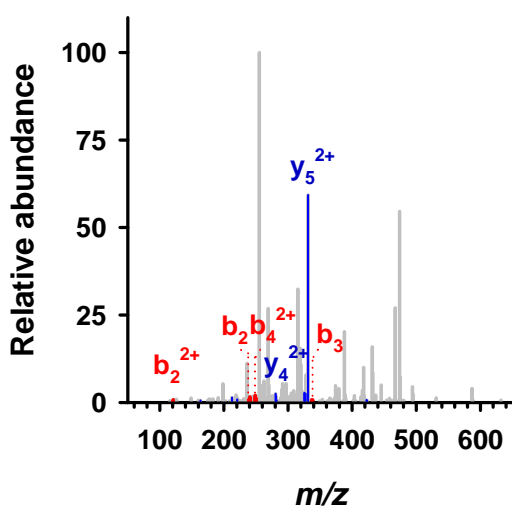

| # | b             | b++           | Seq.      | y             | y++           | y+++          | # |
|---|---------------|---------------|-----------|---------------|---------------|---------------|---|
| 1 |               |               | T         | 662.73        | <b>331.87</b> | <b>221.58</b> | 5 |
| 2 | <b>240.26</b> | <b>120.63</b> | $H^H$     | 561.62        | <b>281.32</b> |               | 4 |
| 3 | <b>337.37</b> | <b>169.19</b> | P         | <b>423.48</b> | <b>212.24</b> |               | 3 |
| 4 | 497.54        | <b>249.27</b> | $C^{CAM}$ | <b>326.36</b> | <b>163.68</b> |               | 2 |
| 5 |               |               | F         | <b>166.2</b>  |               |               | 1 |

SEQUEST result:  
 Matches = 31,  $S_p$ Score = 363.4

$a_{H,NEM}$ : protonated histidine  $H^H$  at His94 and N-ethylmaleimide cysteine  
 $C^{NEM}$  at Cys96 ( $m/z = 365.92$ ,  $z = +2$ )

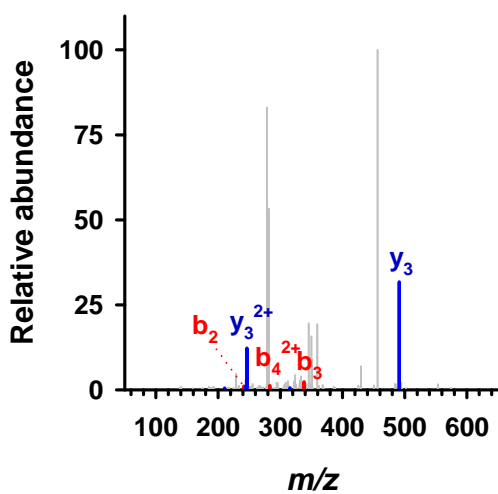

| # | b             | b++           | Seq.      | y             | y++           | y+++          | # |
|---|---------------|---------------|-----------|---------------|---------------|---------------|---|
| 1 |               |               | T         | 730.84        | 365.92        | <b>244.28</b> | 5 |
| 2 | <b>240.26</b> | 120.63        | $H^H$     | <b>629.73</b> | <b>315.37</b> | <b>210.58</b> | 4 |
| 3 | <b>337.37</b> | <b>169.19</b> | P         | <b>491.58</b> | <b>246.3</b>  |               | 3 |
| 4 | <b>565.65</b> | <b>283.33</b> | $C^{NEM}$ | 394.47        | <b>197.74</b> |               | 2 |
| 5 |               |               | F         | 166.2         |               |               | 1 |

SEQUEST result:  
 Matches = 27,  $S_p$ Score = 248.7

a-SS-c: disulfide bond between Cys96 and Cys172 ( $m/z = 978.41$ ,  $z = +3$ )

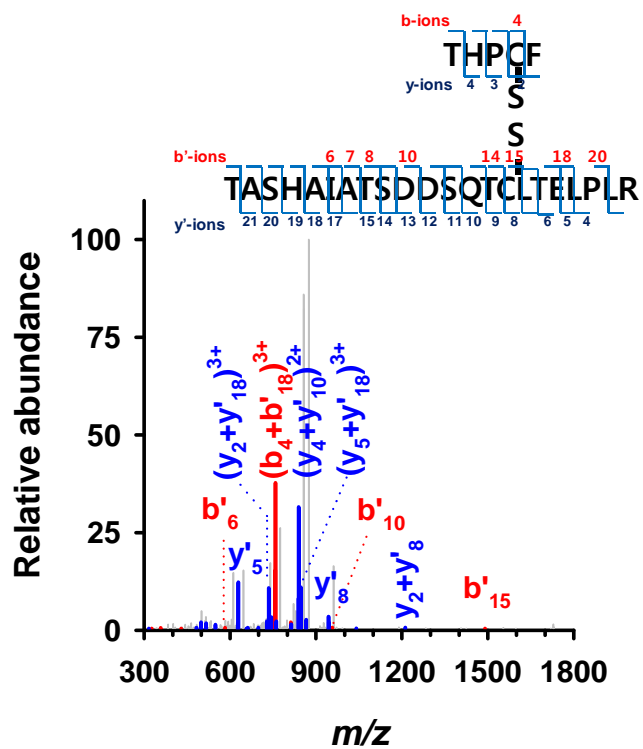

SEQUEST result:  
Matches = 63,  $S_p$ Score = 218

**(b) Tandem mass spectra of the modified peptides of  $^{98}\text{NHSLSGCGGEMPKNKPF}^{113}$  in the panels b and e of extracted ion chromatograms.**

$b_{\text{IAA}}$ : carbamidomethyl cysteine CCAM at Cys104 ( $m/z = 578.30$ ,  $z = +3$ )

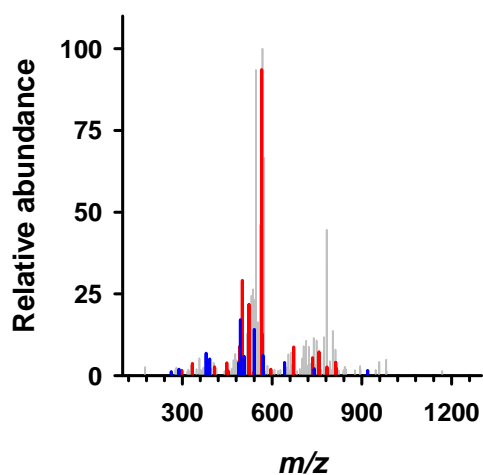

| #  | b       | b++    | b+++   | Seq.             | y       | y++    | y+++   | #  |
|----|---------|--------|--------|------------------|---------|--------|--------|----|
| 1  |         |        |        | N                | 1732.89 | 866.95 | 578.3  | 16 |
| 2  | 252.25  | 126.63 |        | H                | 1618.78 | 809.9  | 540.27 | 15 |
| 3  | 339.33  | 170.17 |        | S                | 1481.64 | 741.33 | 494.55 | 14 |
| 4  | 452.49  | 226.75 |        | L                | 1394.57 | 697.79 | 465.53 | 13 |
| 5  | 539.56  | 270.28 |        | S                | 1281.41 | 641.21 | 427.81 | 12 |
| 6  | 596.61  | 298.81 |        | G                | 1194.33 | 597.67 | 398.78 | 11 |
| 7  | 756.78  | 378.89 | 252.93 | C <sup>CAM</sup> | 1137.28 | 569.14 | 379.77 | 10 |
| 8  | 813.83  | 407.42 | 271.95 | G                | 977.12  | 489.06 | 326.38 | 9  |
| 9  | 870.88  | 435.94 | 290.97 | G                | 920.06  | 460.54 | 307.36 | 8  |
| 10 | 1000    | 500.5  | 334    | E                | 863.01  | 432.01 | 288.34 | 7  |
| 11 | 1131.19 | 566.1  | 377.74 | M                | 733.9   | 367.45 | 245.3  | 6  |
| 12 | 1228.31 | 614.66 | 410.11 | P                | 602.7   | 301.85 | 201.57 | 5  |
| 13 | 1342.41 | 671.71 | 448.14 | N                | 505.59  | 253.3  |        | 4  |
| 14 | 1470.58 | 735.8  | 490.87 | K                | 391.48  | 196.25 |        | 3  |
| 15 | 1567.7  | 784.35 | 523.24 | P                | 263.31  | 132.16 |        | 2  |
| 16 |         |        |        | F                | 166.2   |        |        | 1  |

SEQUEST result:  
Matches = 58,  $S_p$ Score = 330.6

$b_{\text{NEM}}$ : N-ethylmaleimide cysteine C<sup>NEM</sup> at Cys104 ( $m/z = 601.00$ ,  $z = +3$ )

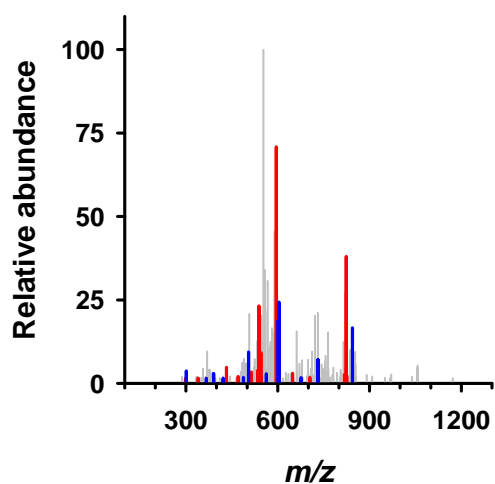

| #  | b       | b++    | b+++   | Seq.             | y       | y++    | y+++   | #  |
|----|---------|--------|--------|------------------|---------|--------|--------|----|
| 1  |         |        |        | N                | 1801    | 901    | 601    | 16 |
| 2  | 252.25  | 126.63 |        | H                | 1686.89 | 843.95 | 562.97 | 15 |
| 3  | 339.33  | 170.17 |        | S                | 1549.75 | 775.38 | 517.26 | 14 |
| 4  | 452.49  | 226.75 |        | L                | 1462.68 | 731.84 | 488.23 | 13 |
| 5  | 539.56  | 270.28 |        | S                | 1349.52 | 675.26 | 450.51 | 12 |
| 6  | 596.61  | 298.81 |        | G                | 1262.44 | 631.72 | 421.48 | 11 |
| 7  | 824.89  | 412.95 | 275.63 | C <sup>NEM</sup> | 1205.39 | 603.2  | 402.47 | 10 |
| 8  | 881.94  | 441.47 | 294.65 | G                | 977.12  | 489.06 | 326.38 | 9  |
| 9  | 938.99  | 470    | 313.67 | G                | 920.06  | 460.54 | 307.36 | 8  |
| 10 | 1068.1  | 534.56 | 356.71 | E                | 863.01  | 432.01 | 288.34 | 7  |
| 11 | 1199.3  | 600.15 | 400.44 | M                | 733.9   | 367.45 | 245.3  | 6  |
| 12 | 1296.42 | 648.71 | 432.81 | P                | 602.7   | 301.85 | 201.57 | 5  |
| 13 | 1410.52 | 705.76 | 470.84 | N                | 505.59  | 253.3  |        | 4  |
| 14 | 1538.69 | 769.85 | 513.57 | K                | 391.48  | 196.25 |        | 3  |
| 15 | 1635.81 | 818.41 | 545.94 | P                | 263.31  | 132.16 |        | 2  |
| 16 |         |        |        | F                | 166.2   |        |        | 1  |

SEQUEST result:  
Matches = 57,  $S_p$ Score = 304.3

$b_{H,IAA}$ : protonated histidine  $H^H$  at His99 and carbamidomethyl cysteine  $C^{CAM}$  at Cys104 ( $m/z = 578.64$ ,  $z = +3$ )

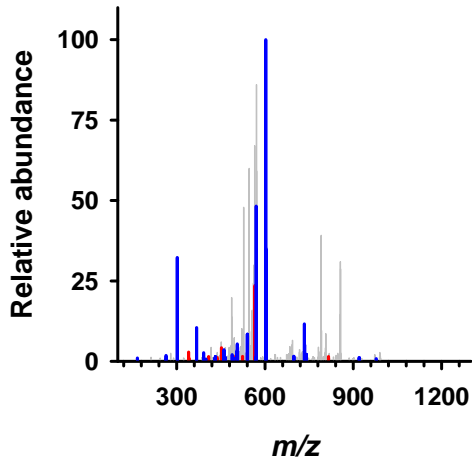

| #  | b       | b++    | b+++   | Seq.      | y       | y++    | y+++   | #  |
|----|---------|--------|--------|-----------|---------|--------|--------|----|
| 1  |         |        |        | N         | 1733.9  | 867.45 | 578.64 | 16 |
| 2  | 253.26  | 127.13 |        | $H^H$     | 1619.79 | 810.4  | 540.6  | 15 |
| 3  | 340.34  | 170.67 |        | S         | 1481.64 | 741.33 | 494.55 | 14 |
| 4  | 453.49  | 227.25 |        | L         | 1394.57 | 697.79 | 465.53 | 13 |
| 5  | 540.57  | 270.79 |        | S         | 1281.41 | 641.21 | 427.81 | 12 |
| 6  | 597.62  | 299.31 |        | G         | 1194.33 | 597.67 | 398.78 | 11 |
| 7  | 757.79  | 379.4  | 253.27 | $C^{CAM}$ | 1137.28 | 569.14 | 379.77 | 10 |
| 8  | 814.84  | 407.92 | 272.28 | G         | 977.12  | 489.06 | 326.38 | 9  |
| 9  | 871.89  | 436.45 | 291.3  | G         | 920.06  | 460.54 | 307.36 | 8  |
| 10 | 1001    | 501.01 | 334.34 | E         | 863.01  | 432.01 | 288.34 | 7  |
| 11 | 1132.2  | 566.6  | 378.07 | M         | 733.9   | 367.45 | 245.3  | 6  |
| 12 | 1229.32 | 615.16 | 410.44 | P         | 602.7   | 301.85 | 201.57 | 5  |
| 13 | 1343.42 | 672.21 | 448.48 | N         | 505.59  | 253.3  |        | 4  |
| 14 | 1471.59 | 736.3  | 491.2  | K         | 391.48  | 196.25 |        | 3  |
| 15 | 1568.71 | 784.86 | 523.57 | P         | 263.31  | 132.16 |        | 2  |
| 16 |         |        |        | F         | 166.2   |        |        | 1  |

SEQUEST result:

Matches = 62,  $S_p$ Score = 429.7

$b_{H,NEM}$ : protonated histidine  $H^H$  at His99 and N-ethylmaleimide cysteine  $C^{CAM}$  at Cys104 ( $m/z = 601.34$ ,  $z = +3$ )

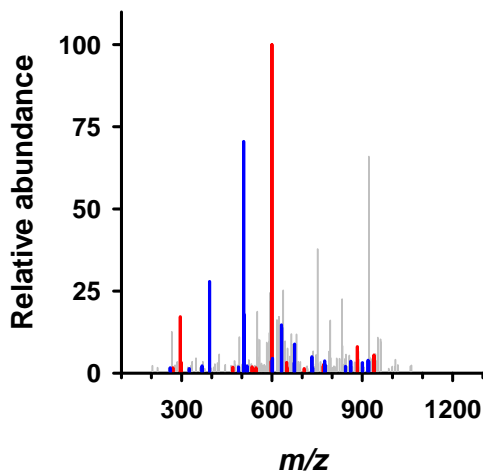

| #  | b       | b++    | b+++   | Seq.      | y       | y++    | y+++   | #  |
|----|---------|--------|--------|-----------|---------|--------|--------|----|
| 1  |         |        |        | N         | 1802    | 901.51 | 601.34 | 16 |
| 2  | 253.26  | 127.13 |        | $H^H$     | 1687.9  | 844.45 | 563.3  | 15 |
| 3  | 340.34  | 170.67 |        | S         | 1549.75 | 775.38 | 517.26 | 14 |
| 4  | 453.49  | 227.25 |        | L         | 1462.68 | 731.84 | 488.23 | 13 |
| 5  | 540.57  | 270.79 |        | S         | 1349.52 | 675.26 | 450.51 | 12 |
| 6  | 597.62  | 299.31 |        | G         | 1262.44 | 631.72 | 421.48 | 11 |
| 7  | 825.9   | 413.45 | 275.97 | $C^{NEM}$ | 1205.39 | 603.2  | 402.47 | 10 |
| 8  | 882.95  | 441.98 | 294.99 | G         | 977.12  | 489.06 | 326.38 | 9  |
| 9  | 940     | 470.5  | 314    | G         | 920.06  | 460.54 | 307.36 | 8  |
| 10 | 1069.11 | 535.06 | 357.04 | E         | 863.01  | 432.01 | 288.34 | 7  |
| 11 | 1200.31 | 600.66 | 400.77 | M         | 733.9   | 367.45 | 245.3  | 6  |
| 12 | 1297.42 | 649.22 | 433.15 | P         | 602.7   | 301.85 | 201.57 | 5  |
| 13 | 1411.53 | 706.27 | 471.18 | N         | 505.59  | 253.3  |        | 4  |
| 14 | 1539.7  | 770.35 | 513.9  | K         | 391.48  | 196.25 |        | 3  |
| 15 | 1636.82 | 818.91 | 546.28 | P         | 263.31  | 132.16 |        | 2  |
| 16 |         |        |        | F         | 166.2   |        |        | 1  |

SEQUEST result:

Matches = 54,  $S_p$ Score = 333.1

(c) Tandem mass spectra of the modified peptides of  $^{158}\text{TASHAIATSDDSQTCLTELPLR}^{179}$  in the panels c and f of extracted ion chromatograms.

$c_{\text{IAA}}$ : carbamidomethyl cysteine  $\text{C}^{\text{CAM}}$  at Cys172 ( $m/z = 796.86$ ,  $z = +3$ )

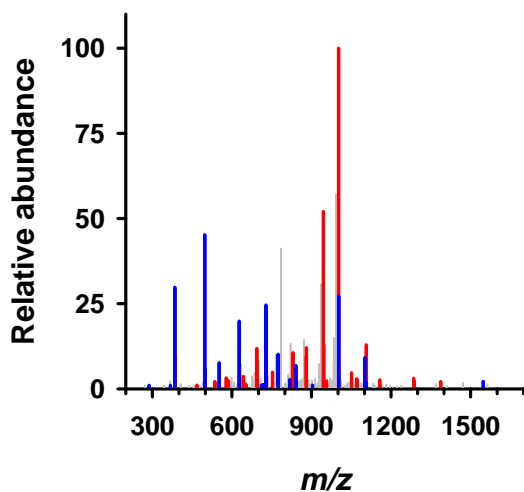

| #  | b              | b++            | b+++          | Seq.                    | y              | y++            | y+++          | #  |
|----|----------------|----------------|---------------|-------------------------|----------------|----------------|---------------|----|
| 1  |                |                |               | T                       | 2388.56        | 1194.78        | 796.86        | 22 |
| 2  | 173.19         |                |               | A                       | 2287.45        | 1144.23        | 763.16        | 21 |
| 3  | 260.27         | 130.64         |               | S                       | 2216.38        | <b>1108.69</b> | 739.46        | 20 |
| 4  | 397.41         | 199.21         |               | H                       | 2129.3         | 1065.15        | <b>710.44</b> | 19 |
| 5  | <b>468.48</b>  | 234.75         |               | A                       | 1992.16        | 996.58         | 664.72        | 18 |
| 6  | <b>581.64</b>  | 291.32         |               | I                       | 1921.08        | 961.04         | 641.03        | 17 |
| 7  | <b>652.72</b>  | 326.86         | 218.24        | A                       | 1807.92        | <b>904.47</b>  | 603.31        | 16 |
| 8  | <b>753.82</b>  | 377.42         | 251.95        | T                       | 1736.85        | 868.93         | <b>579.62</b> | 15 |
| 9  | <b>840.9</b>   | 420.95         | 280.97        | S                       | 1635.74        | <b>818.37</b>  | 545.92        | 14 |
| 10 | <b>955.99</b>  | 478.5          | 319.33        | D                       | <b>1548.66</b> | <b>774.84</b>  | 516.89        | 13 |
| 11 | <b>1071.08</b> | <b>536.04</b>  | 357.7         | D                       | 1433.58        | <b>717.29</b>  | 478.53        | 12 |
| 12 | <b>1158.15</b> | <b>579.58</b>  | <b>386.72</b> | S                       | 1318.49        | 659.75         | 440.17        | 11 |
| 13 | <b>1286.28</b> | <b>643.65</b>  | 429.43        | Q                       | 1231.41        | 616.21         | 411.14        | 10 |
| 14 | <b>1387.39</b> | <b>694.2</b>   | 463.13        | T                       | <b>1103.28</b> | <b>552.15</b>  | <b>368.43</b> | 9  |
| 15 | <b>1547.55</b> | <b>774.28</b>  | 516.52        | $\text{C}^{\text{CAM}}$ | <b>1002.18</b> | 501.59         | 334.73        | 8  |
| 16 | 1660.71        | <b>830.86</b>  | 554.24        | L                       | <b>842.01</b>  | 421.51         | 281.34        | 7  |
| 17 | 1761.81        | <b>881.41</b>  | <b>587.94</b> | T                       | <b>728.86</b>  | 364.93         | 243.62        | 6  |
| 18 | 1890.93        | <b>945.97</b>  | 630.98        | E                       | <b>627.75</b>  | 314.38         | 209.92        | 5  |
| 19 | 2004.09        | <b>1002.55</b> | 668.7         | L                       | <b>498.64</b>  | 249.82         |               | 4  |
| 20 | 2101.2         | <b>1051.1</b>  | 701.07        | P                       | <b>385.48</b>  | 193.24         |               | 3  |
| 21 | 2214.36        | <b>1107.68</b> | 738.79        | L                       | <b>288.37</b>  | 144.69         |               | 2  |
| 22 |                |                |               | R                       | 175.21         |                |               | 1  |

SEQUEST result:  
Matches = 90,  $S_p$ Score = 961.6

C<sub>NEM</sub>: N-ethylmaleimide cysteine C<sup>NEM</sup> at Cys172 ( $m/z = 819.56$ ,  $z = +3$ )

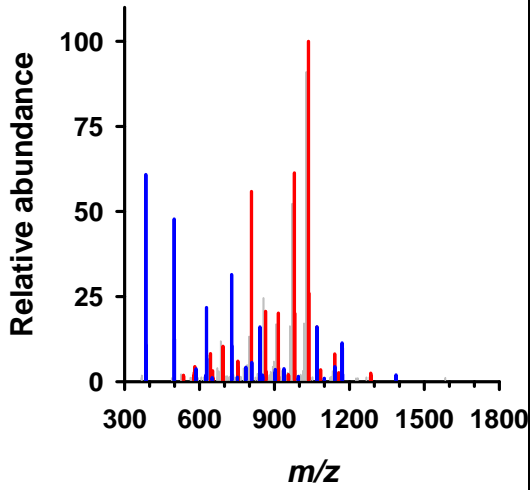

| #  | b              | b++            | b+++          | Seq.             | y              | y++           | y+++          | #  |
|----|----------------|----------------|---------------|------------------|----------------|---------------|---------------|----|
| 1  |                |                |               | T                | 2456.67        | 1228.84       | 819.56        | 22 |
| 2  | 173.19         |                |               | A                | 2355.56        | 1178.29       | <b>785.86</b> | 21 |
| 3  | 260.27         | 130.64         |               | S                | 2284.48        | <b>1142.8</b> | 762.17        | 20 |
| 4  | 397.41         | 199.21         |               | H                | 2197.41        | <b>1099.2</b> | 733.14        | 19 |
| 5  | 468.48         | 234.75         |               | A                | 2060.27        | 1030.64       | 687.43        | 18 |
| 6  | <b>581.64</b>  | 291.32         |               | I                | 1989.19        | <b>995.1</b>  | 663.73        | 17 |
| 7  | <b>652.72</b>  | 326.86         | 218.24        | A                | 1876.03        | <b>938.52</b> | <b>626.02</b> | 16 |
| 8  | <b>753.82</b>  | 377.42         | 251.95        | T                | 1804.95        | <b>902.98</b> | 602.32        | 15 |
| 9  | <b>840.9</b>   | 420.95         | 280.97        | S                | 1703.85        | <b>852.43</b> | 568.62        | 14 |
| 10 | <b>955.99</b>  | 478.5          | 319.33        | D                | 1616.77        | <b>808.89</b> | 539.6         | 13 |
| 11 | <b>1071.08</b> | <b>536.04</b>  | 357.7         | D                | 1501.69        | <b>751.35</b> | 501.23        | 12 |
| 12 | <b>1158.15</b> | <b>579.58</b>  | <b>386.72</b> | S                | <b>1386.6</b>  | <b>693.8</b>  | 462.87        | 11 |
| 13 | <b>1286.28</b> | <b>643.65</b>  | 429.43        | Q                | 1299.52        | <b>650.26</b> | 433.85        | 10 |
| 14 | <b>1387.39</b> | <b>694.2</b>   | 463.13        | T                | <b>1171.39</b> | <b>586.2</b>  | 391.14        | 9  |
| 15 | 1615.66        | <b>808.33</b>  | 539.23        | C <sup>CAM</sup> | <b>1070.29</b> | <b>535.65</b> | 357.43        | 8  |
| 16 | 1728.82        | <b>864.91</b>  | <b>576.94</b> | L                | <b>842.01</b>  | 421.51        | 281.34        | 7  |
| 17 | 1829.92        | <b>915.46</b>  | 610.65        | T                | <b>728.86</b>  | 364.93        | 243.62        | 6  |
| 18 | 1959.04        | <b>980.02</b>  | <b>653.68</b> | E                | <b>627.75</b>  | 314.38        | 209.92        | 5  |
| 19 | 2072.19        | <b>1036.6</b>  | 691.4         | L                | <b>498.64</b>  | 249.82        |               | 4  |
| 20 | 2169.31        | <b>1085.16</b> | 723.77        | P                | <b>385.48</b>  | 193.24        |               | 3  |
| 21 | 2282.47        | <b>1141.74</b> | 761.49        | L                | 288.37         | 144.69        |               | 2  |
| 22 |                |                |               | R                | 175.21         |               |               | 1  |

SEQUEST result:  
Matches = 103, S<sub>p</sub>Score = 1335.4



**Supplemental Figure S2. Elution profiles from a size exclusion chromatographic column, showing the molecular size of the CueP C172S protein.** CueP variant protein (C172S) was purified in freshly prepared 20 mM Tris (pH 8.0) buffer containing 150 mM NaCl and 2 mM 2-mercaptoethanol. The protein sample was dialyzed against highly-degassed 20 mM Tris (pH 8.0) buffer containing 150 mM NaCl to remove the reducing agent. The protein sample (1 mg/ml, 100  $\mu$ l) was injected on the size exclusion chromatographic column (Superdex 200 10/30) at a flow rate of 0.5 ml/min using the same degassed buffer. Each fraction was analyzed on SDS-PAGE (insets). The calculated molecular size was  $\sim$ 70 kDa, which is twice than the wild type protein ( $\sim$ 34 kDa; Fig. 2C)

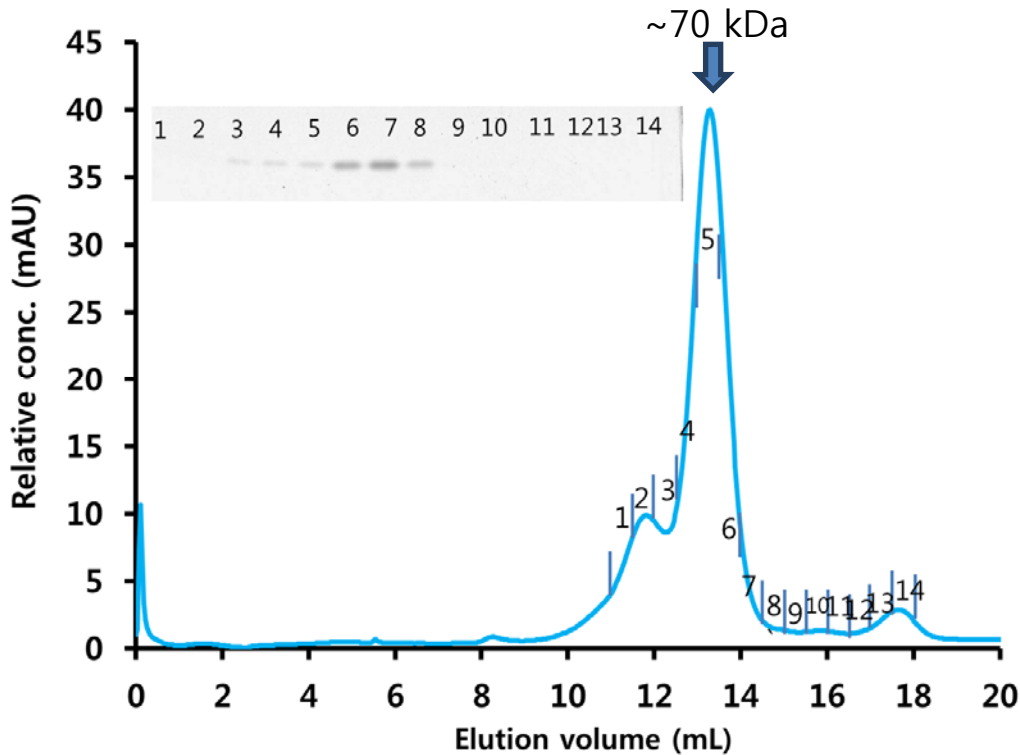

Supplemental Figure S3. Reactivity of CueP variants to H<sub>2</sub>O<sub>2</sub>. The same procedures were used as in Fig. 4B.

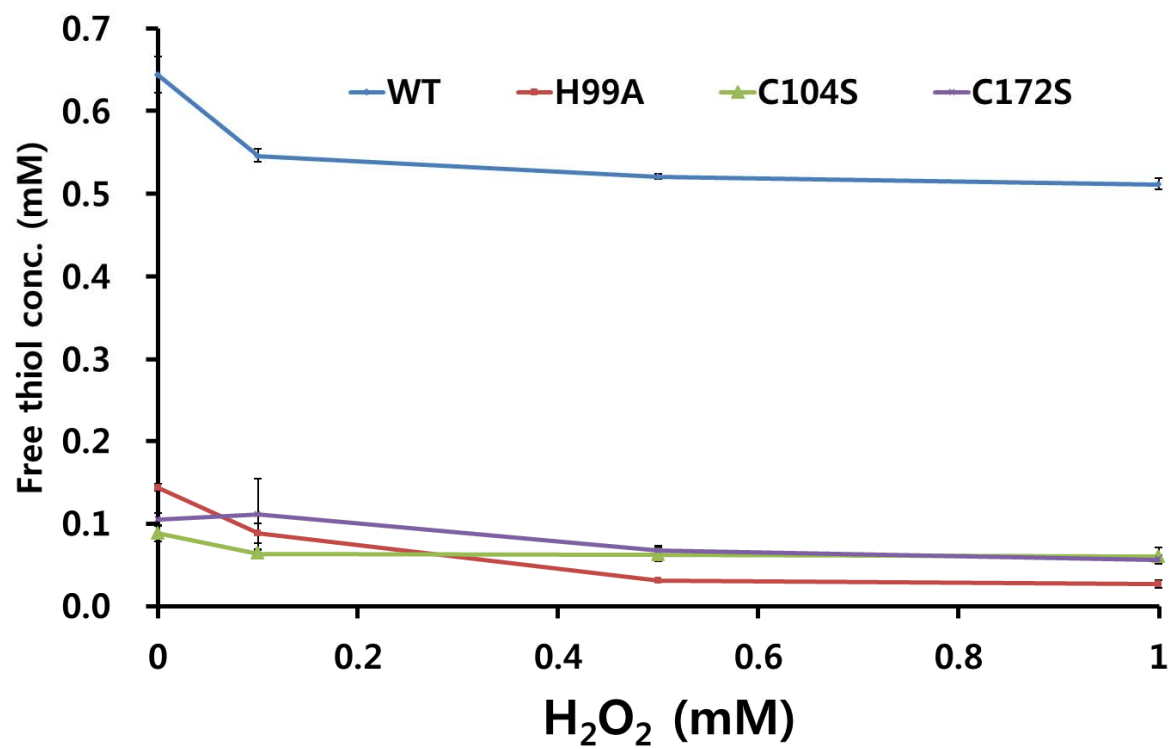

**Supplemental Figure S4. Expression of CueP in *cusA*-deleted *E. coli* strain BW25112.**

The *E. coli* strain harboring the plasmid was grown exponentially, and then 5  $\mu$ g of cell lysate was applied to SDS-PAGE. Expressed CueP proteins were visualized by western blot using anti-CueP antibody (*left*). As a loading control, the SDS-polyacrylamide gel stained by coomassie blue is shown (*right*). EV indicates the empty vector, and CueP indicates the cueP-containing vector. \* indicates the purified CueP protein (50 ng). This figure is for Fig. 5D.

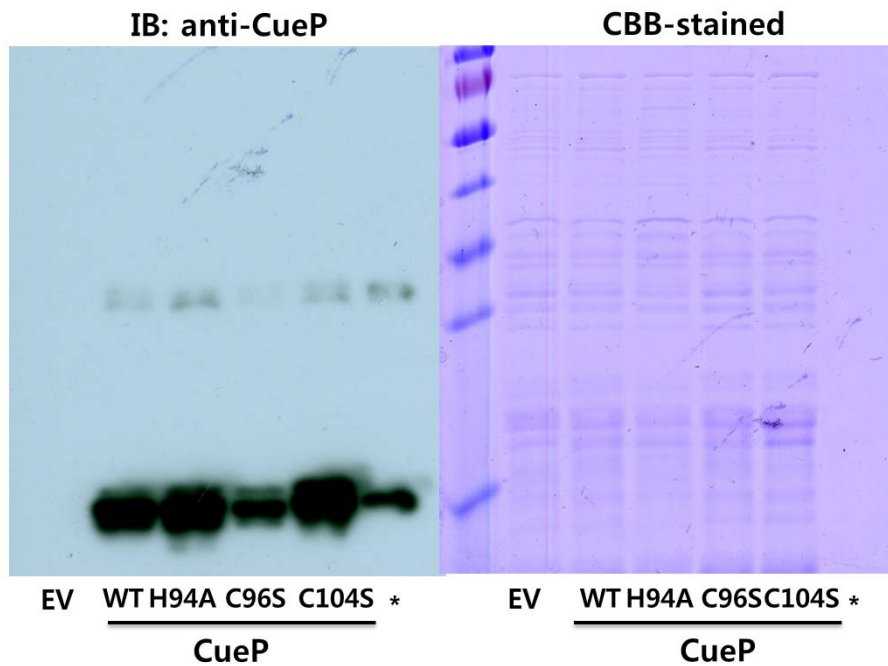

Supplement: molcell-37-2-100-3-supplementary.pdf [file molcell-37-2-100-3-supplementary.pdf]
